# Supplementary material for: The interaction of β2-microglobulin with gold nanoparticles: impact of coating, charge and size
Source: Royal Society of Chemistry journal article supplement (doi:10.1039/c8tb01129j), 2018-01-01
Supplement: c8tb01129j1.pdf [file c8tb01129j1.pdf]

## Electronic Supplementary Information:

### The interaction of $\beta$ 2-microglobulin and gold nanoparticles: impact of coating, charge and size

*Cristina Cantarutti,<sup>a</sup> Paolo Bertoncin,<sup>b</sup> Paola Posocco,<sup>c</sup> Yamanappa Hunashal,<sup>a</sup> Sofia Giorgetti,<sup>d</sup>  
Vittorio Bellotti,<sup>d,e</sup> Federico Fogolari<sup>f,g</sup> and Gennaro Esposito<sup>f,g,h\*</sup>*

<sup>a</sup>*DAME, Università di Udine, P.le Kolbe 4, 33100 Udine, Italy;*

<sup>b</sup>*Dipartimento di Scienze della Vita, Università di Trieste, Via Weiss 2, 34128 Trieste, Italy;*

<sup>c</sup>*Dipartimento di Ingegneria ed Architettura, Università di Trieste, Via Valerio 10, 34127 Trieste, Italy;*

<sup>d</sup>*Dipartimento di Medicina Molecolare, Università di Pavia, Via Taramelli 3, 27100 Pavia, Italy;*

<sup>e</sup>*Division of Medicine, University College of London, London NW3 2PF, UK;*

<sup>f</sup>*DMIF, Università di Udine, Viale delle Scienze, 33100 Udine, Italy;*

<sup>g</sup>*INBB, Viale Medaglie d'Oro 305, 00136 Roma, Italy;*

<sup>h</sup>*Science and Math Division, New York University Abu Dhabi, PO Box 129188, Abu Dhabi, UAE.*

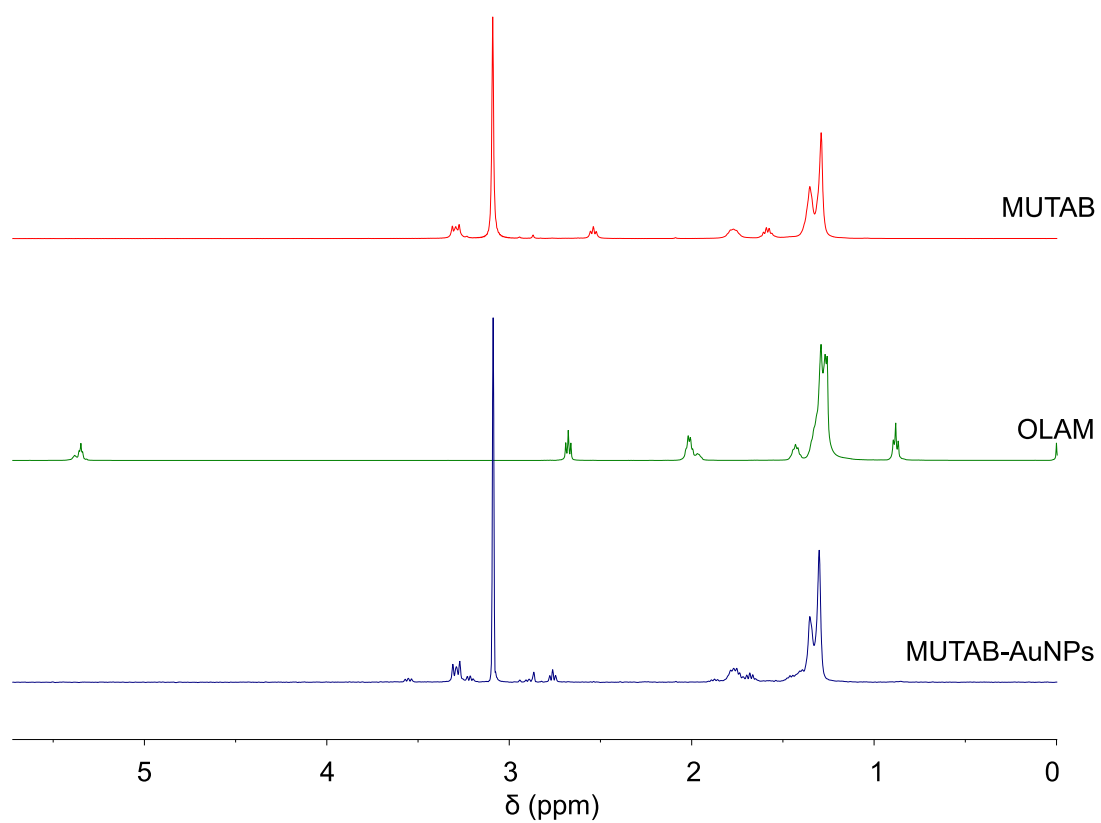

**Fig. S1** <sup>1</sup>H NMR spectra of MUTAB in D<sub>2</sub>O (red trace), OLAM in CDCl<sub>3</sub> (green trace) and MUTAB-AuNPs in D<sub>2</sub>O (purple trace) indicating no presence of OLAM in MUTAB-AuNPs.

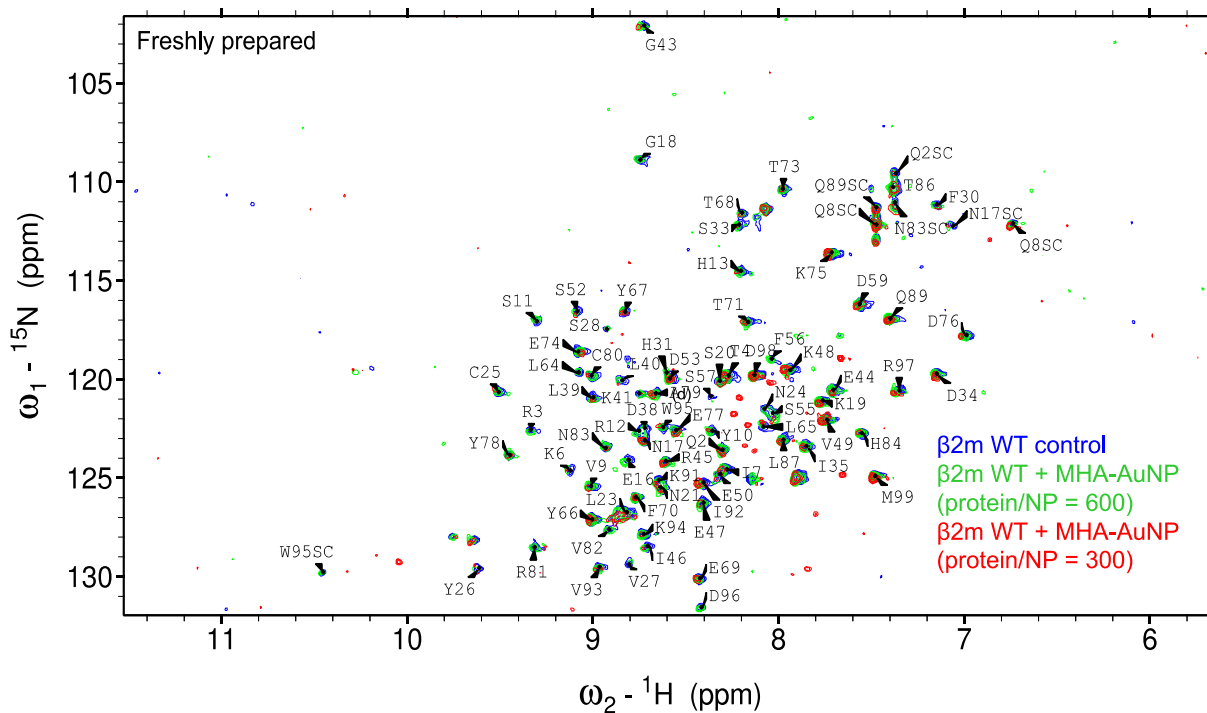

**Fig. S2** Superimposition of  $\beta 2m$  WT  $^{15}\text{N}$ - $^1\text{H}$  SOFAST HMQC spectra recorded at 500 MHz ( $^1\text{H}$  frequency) without (blue) and with MHA-AuNP (protein/NP = 600 in green and protein/NP = 300 in red). The corresponding backbone amide assignments are reported by single letter code and the side-chain amides are indicated by SC.

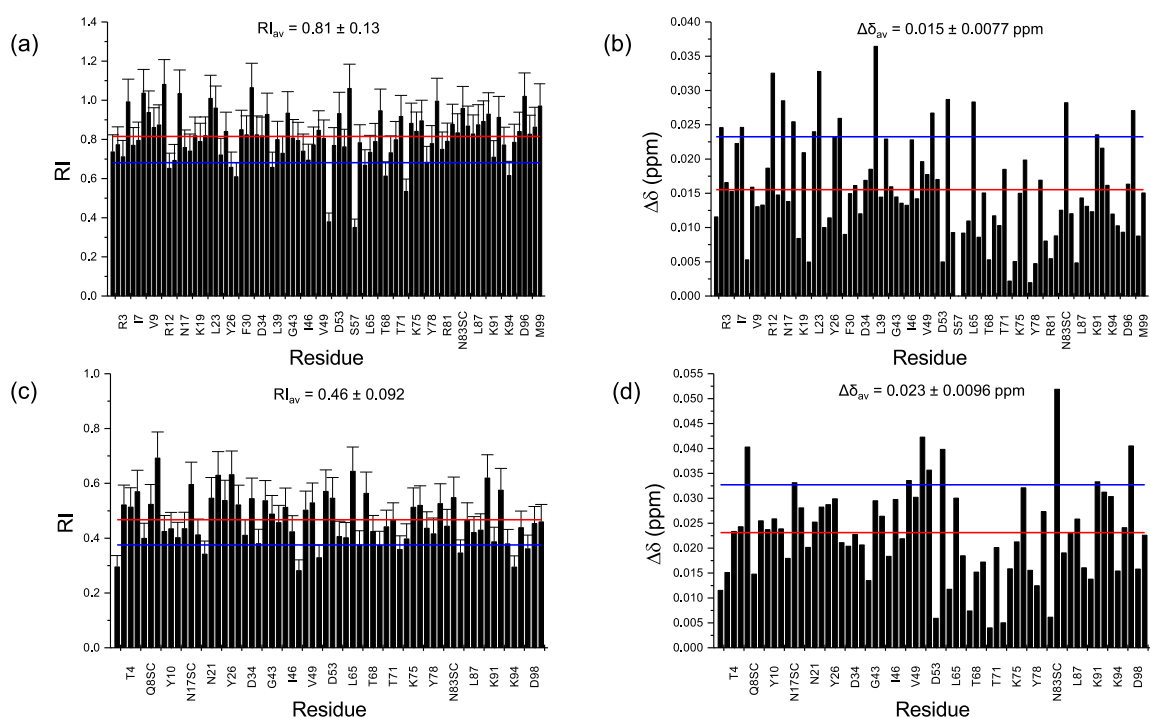

**Fig. S3** a) and b) Bar plots of  $\beta$ 2m amide cross-peak attenuations (RI) and combined chemical shift perturbations ( $\Delta\delta$ ), respectively, against the protein sequence, at protein/ MHA-AuNP = 600. c) and d) Bar plots of  $\beta$ 2m amide cross-peak attenuations (RI) and combined chemical shift perturbations ( $\Delta\delta$ ), respectively, against the protein sequence, at protein/MHA-AuNP = 300. The horizontal lines indicate, respectively, the average values (red) and the displacement of one standard deviation (blue) above or below the average. To avoid graphic crowding, the abscissa labels of the panels were reported only every other three residues. Besides the observed backbone amides, also the following side-chain (SC) NH resonances were detected and included in the abscissa label list, according to the primary sequence order: Q2, Q8 (two separate signals), N17, N83, Q89, W95. The missing labels do not include the following unobserved or non-existing backbone NH connectivities: I1, P5, Q8, P14, A15, F22, G29, P32, E36, V37, N42, H51, L54, K58, W60, S61, F62, Y63, P72, V85, S88, P90. In addition to the listed residues, also R3, S11, R12, N24, V27, S28, H31, D38, L40, K41, F56, S57, L64, C80, R81, V82 and D96 were unobservable in the SOFAST HMQC maps from the solution with a higher NP concentration. It is worth highlighting that SOFAST experiments are very convenient to screen quickly the appearance of the two-dimensional NMR spectra, but they have a lower signal-to-noise ratio and non-uniform excitation artefacts compared to HSQC spectra acquired with same number of scans. To compromise between the need of minimising the measurement time and the necessity of quantification, acquisitions were typically limited to  $\sim$ 6-12 hours. The appreciable uncertainty on intensity measurements limited the confidence threshold for some of the observed changes. For instance, with a typical  $\Delta$ (intensity) around 8%, all the values above unity in panel (a) in the spectrum recorded in presence of MHA-AuNPs should be considered with caution.

**Table S1** Synopsis of WT  $\beta$ 2m amides that proved most affected by the presence of MHA-AuNP, i.e. displaced more than one standard deviation from the average  $\Delta\delta$  and RI values. The amides are grouped according to the secondary structure element location.

| Structure region | $\Delta\delta$ outliers<br>$\beta$ 2m/NP = 600 | RI outliers<br>$\beta$ 2m/NP = 600 | $\Delta\delta$ outliers<br>$\beta$ 2m/NP = 300 | RI outliers<br>$\beta$ 2m/NP = 300 |
|------------------|------------------------------------------------|------------------------------------|------------------------------------------------|------------------------------------|
| N-term, A strand | I7                                             |                                    | I7                                             |                                    |
| AB loop          | R12, E16, N17SC                                | R12                                | N17SC                                          | S20                                |
| B strand         | N21SC, L23, V27                                | Y26, V27                           | L23                                            | Y26                                |
| BC loop          |                                                |                                    |                                                |                                    |
| CC', C'D loops   | D38                                            | D38                                | K48                                            | E47                                |
| D strand         | E50                                            | E50                                | E50, S52                                       | E50                                |
| DE loop          | S55                                            | S57                                | S55                                            |                                    |
| E strand         | L65                                            | L64, T68                           | L65                                            | T68                                |
| EF loop          |                                                | T73                                |                                                | T73, E69                           |
| F strand         | H84                                            |                                    | N83SC, H84                                     | H84                                |
| FG loop          |                                                |                                    |                                                |                                    |
| G strand, C-term | K91, R97                                       | K94                                | K91                                            | K94                                |

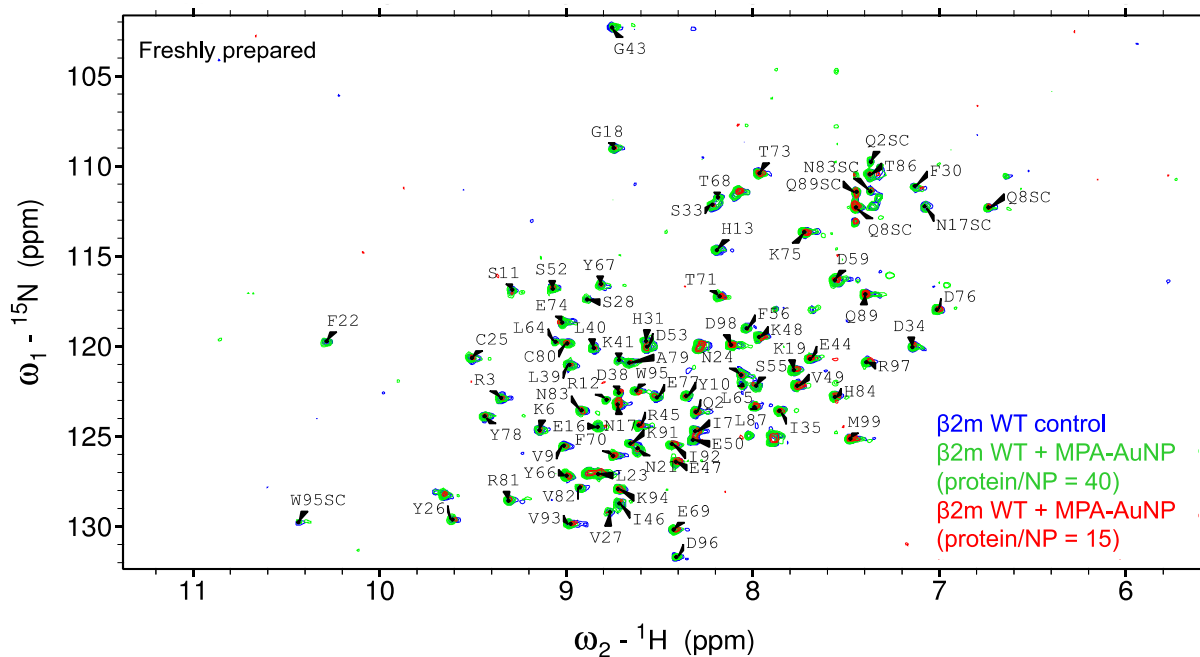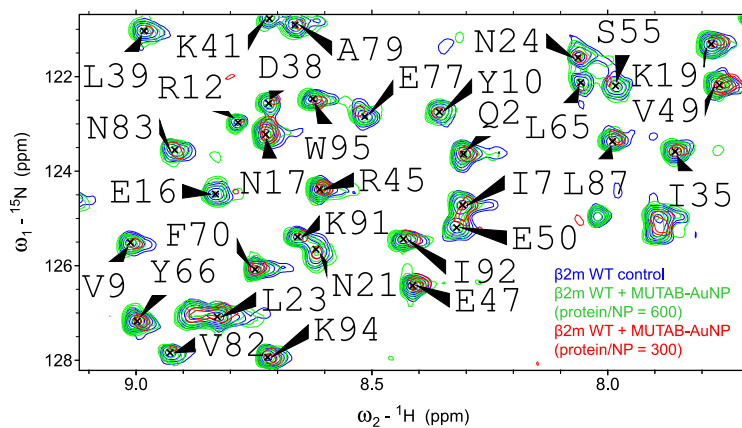

**Fig. S4** Superimposition of  $\beta 2m$  WT  $^{15}N$ - $^1H$  SOFAST HMQC spectra recorded at 500 MHz ( $^1H$  frequency) without (blue) and with MUTAB-AuNP (protein/NP = 600 in green and protein/NP = 300 in red). A partial magnification is reported below to illustrate overlay details. The corresponding backbone amide assignments are reported by single letter code and the side-chain amides are indicated by SC.

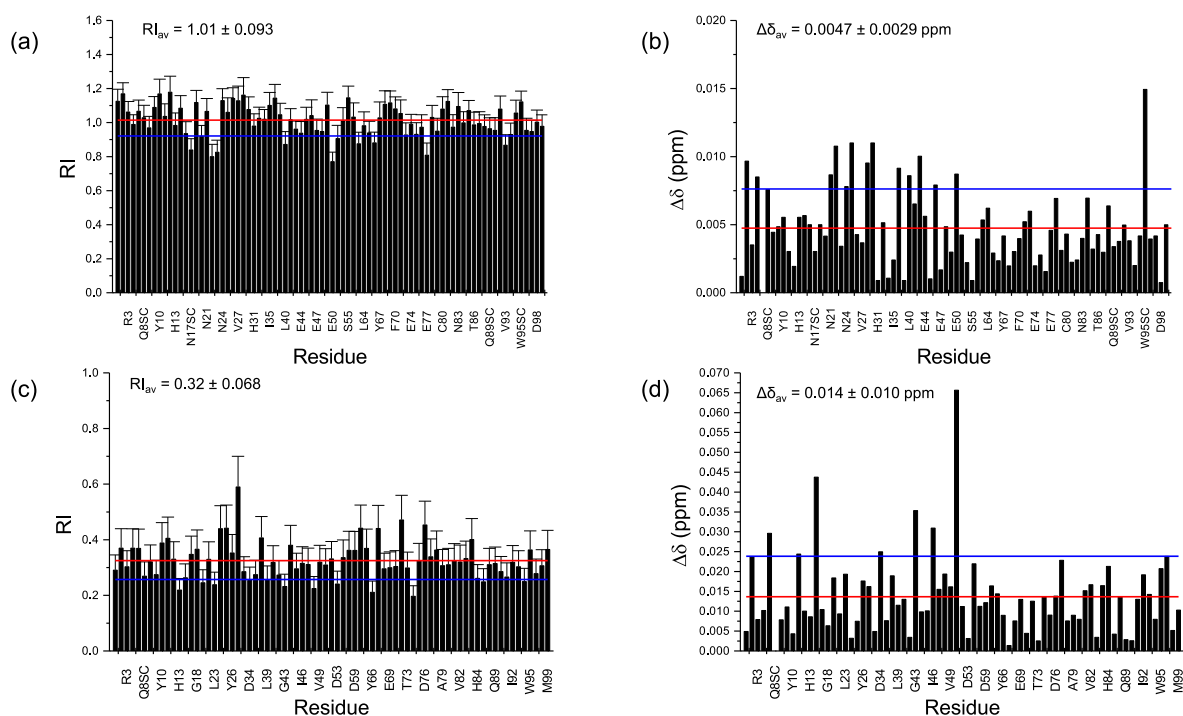

**Fig. S5** a) and b)  $\beta$ 2m amide cross-peak attenuations (RI) and combined chemical shift perturbations ( $\Delta\delta$ ), respectively, against the protein sequence, at protein/ /MUTAB-AuNP = 600. c) and d)  $\beta$ 2m amide cross-peak attenuations (RI) and combined chemical shift perturbations ( $\Delta\delta$ ), respectively, against the protein sequence, at protein/ /MUTAB-AuNP = 300. The horizontal lines indicate, respectively, the average values (red) and the displacement of one standard deviation (blue) above or below the average. To avoid graphic crowding, the abscissa labels of the panels were reported only every other three residues. Besides the observed backbone amides, also the following side-chain (SC) NH resonances were detected and included in the abscissa label list, according to the primary sequence order: Q2, Q8 (two separate signals), N17, N83, Q89, W95. The missing labels do not include the following unobserved or non-existing backbone NH connectivities: I1, T4, P5, Q8, P14, A15, S20, G29, P32, E36, V37, N42, H51, L54, S57, K58, W60, S61, F62, Y63, P72, V85, S88, P90. In addition to the listed residues, also F22, S28, F30, H31 and D96 were unobservable in the spectrum of the solution with a higher NP concentration.

**Table S2** Synopsis of WT  $\beta$ 2m amides that proved most affected by the presence of MUTAB-AuNP, i.e. displaced more than one standard deviation from the average  $\Delta\delta$  and RI values. The amides are grouped according to the secondary structure element location.

| Structure region | $\Delta\delta$ outliers<br>$\beta$ 2m/NP = 600 | RI outliers<br>$\beta$ 2m/NP = 600 | $\Delta\delta$ outliers<br>$\beta$ 2m/NP = 300 | RI outliers<br>$\beta$ 2m/NP = 300 |
|------------------|------------------------------------------------|------------------------------------|------------------------------------------------|------------------------------------|
| N-term, A strand |                                                |                                    | I7, S11                                        |                                    |
| AB loop          |                                                | N17SC, K19                         | E16                                            | H13, K19                           |
| B strand         | F22, C25                                       | F22, L23                           |                                                | L23                                |
| BC loop          | F30                                            |                                    | D34                                            | D34                                |
| CC', C'D loops   |                                                | L40                                | G43, I46                                       | G43                                |
| D strand         |                                                | E50                                | E50                                            | K48                                |
| DE loop          |                                                | S52, D59                           |                                                | D53                                |
| E strand         |                                                | Y66                                |                                                |                                    |
| EF loop          |                                                | E77                                |                                                | E74                                |
| F strand         |                                                |                                    |                                                |                                    |
| FG loop          |                                                |                                    |                                                | T86                                |
| G strand, C-term | W95SC                                          | V93                                | R97                                            | K94                                |



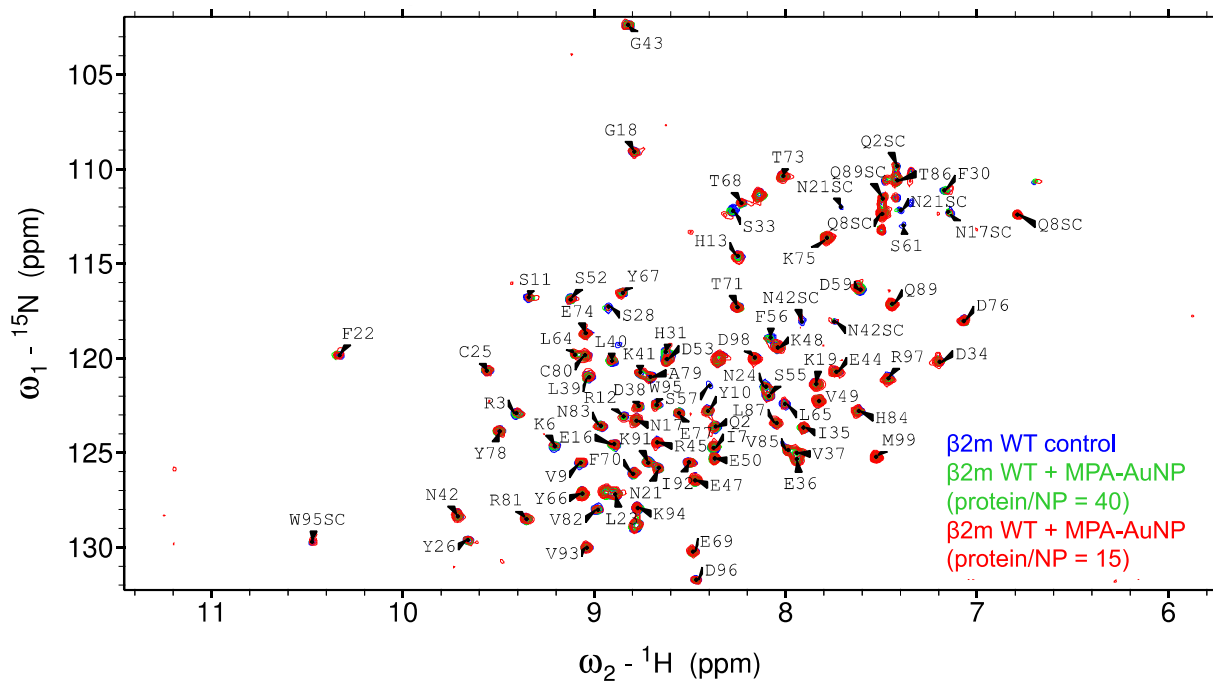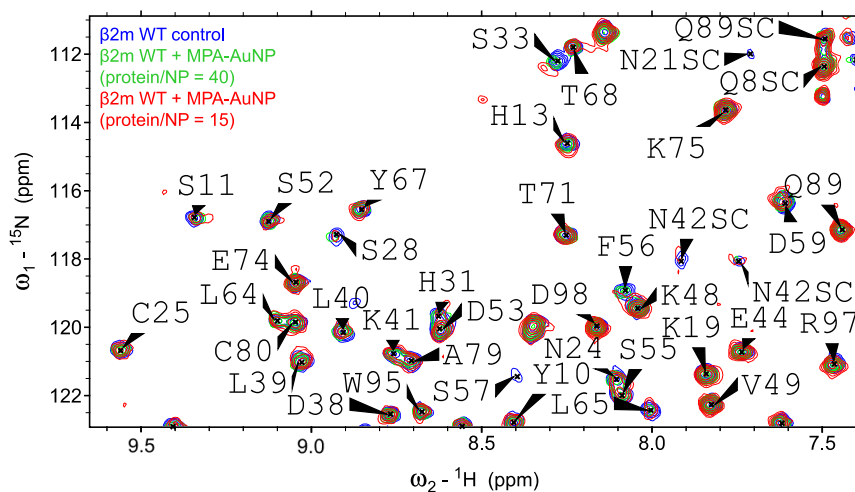

**Fig. S6** Superimposition of β2m  ${}^1\text{H}$   ${}^{15}\text{N}$  SOFAST HMQC spectra recorded at 500 MHz ( ${}^1\text{H}$  frequency) in absence of MPA-AuNPs (blue) and in presence of MPA-AuNPs with protein/NP ratio of 40 (green) and of 15 (red). A partial magnification is reported below to illustrate overlay details. The corresponding backbone amide assignments are reported by single letter code and the side-chain amides are indicated with SC.

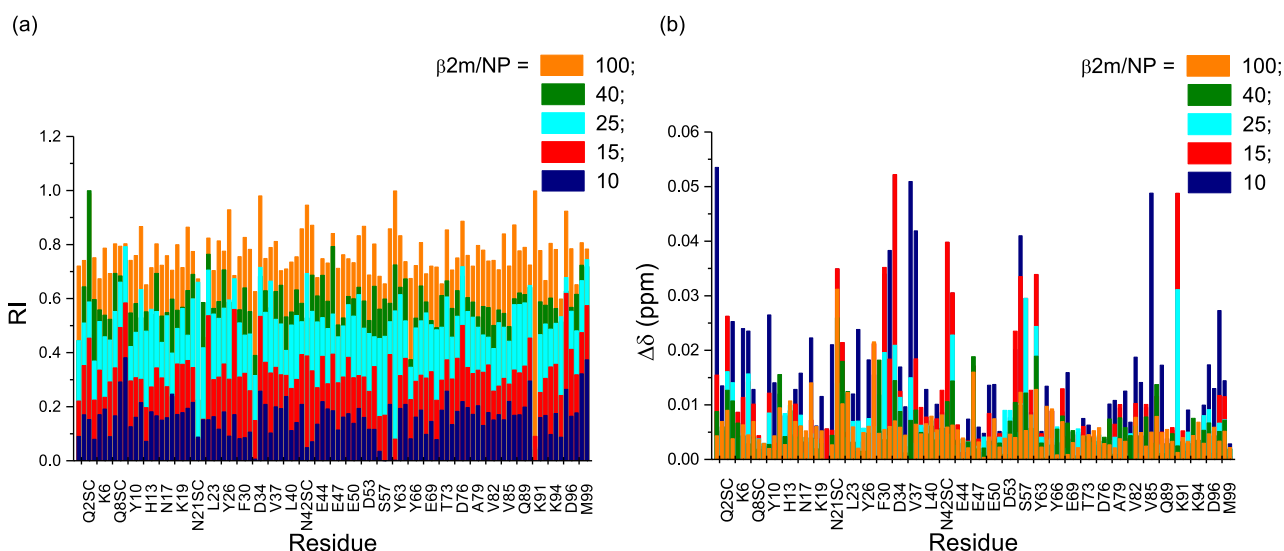

**Fig. S7** a) and b)  $\beta$ 2m amide cross-peak attenuations (RI) and combined chemical shift perturbations ( $\Delta\delta$ ), respectively, against the protein sequence, at different protein/MPA-AuNP ratios. Refer to color legend for the protein/MPA-AuNP ratios colour attributions. To avoid graphic crowding, the abscissa labels of the panels were reported only every other three residues. Besides the observed backbone amides, also the following side-chain (SC) NH resonances were detected and included in the abscissa label list, according to the primary sequence order: Q2, Q8, N17, N83, Q89, W95. The missing labels do not include the following unobserved or non-existing backbone NH connectivities: I1, P5, P14, G29, P32, L54, K58, D59, W60, F62, P72, S88, and P90. In addition to the listed residues, also R3, S11, R12, N24, V27, S28, H31, D38, L40, K41, F56, S57, L64, C80, R81, V82 and D96 were unobservable in the spectra of the solution with increasing NP concentrations.

**Table S3** Synopsis of WT  $\beta$ 2m amides that proved most affected by the presence of MPA-AuNP, i.e. displaced more than one standard deviation from the average  $\Delta\delta$  and RI values. The amides are grouped according to the secondary structure element location.

| Structure region | $\Delta\delta$ outliers | RI outliers   |
|------------------|-------------------------|---------------|
| N-term, A strand | R3                      | R3            |
| AB loop          |                         |               |
| B strand         |                         | S28           |
| BC loop          | F30, H31, S33           | F30, H31, S33 |
| CC', C'D loops   | E36, V37                |               |
| D strand         |                         |               |
| DE loop          | S55, F56, S57, S61      | F56, S57, S61 |
| E strand         |                         | L65           |
| EF loop          |                         |               |
| F strand         |                         |               |
| FG loop          |                         |               |
| G strand, C-term |                         |               |

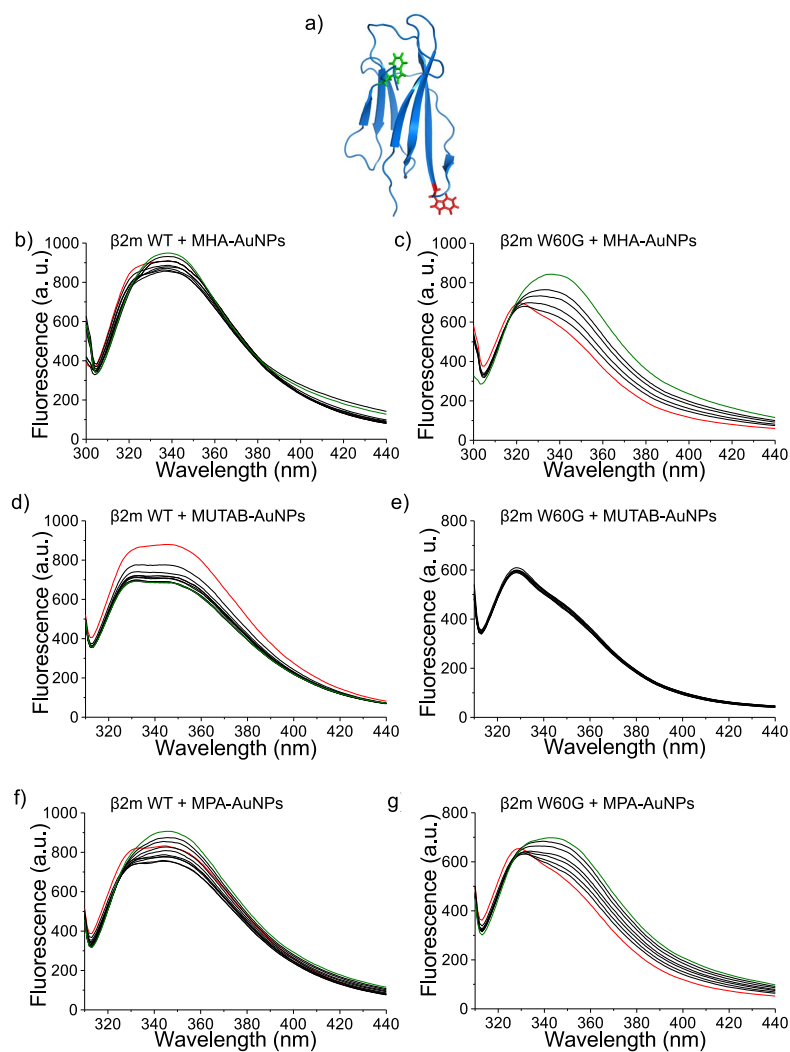

**Fig. S8** a) Ribbon representation of  $\beta 2m$  backbone solution structure<sup>41</sup> highlighting the different exposure of the two tryptophans of the molecule, with the solvent-exposed W60 (red) and the buried W95 (green). b) and c) Fluorescence quenching of 0.5  $\mu M$  WT and W60G  $\beta 2m$ , respectively, with MHA-AuNPs (protein/NP from 5000 to 500). d) and e) Fluorescence quenching of 0.5  $\mu M$  WT and W60G  $\beta 2m$ , respectively, with MUTAB-AuNPs (protein/NP from 5000 to 500). f) and g) Fluorescence quenching of 0.5  $\mu M$  WT and W60G  $\beta 2m$ , respectively, with MPA-AuNPs concentrations ranging from 0 to 55 nM. The control spectra are coloured in red, while the last titration points in green.
